# Supplementary material for: Complex Microlandscape as a Structural Unit of the Study of Spatiotemporal Development of an Ombrotrophic Suboceanic Bog
Source: MDPI journal article supplement (doi:10.3390/quat7020019), 2024-04-15
Supplement: s1 [file s1]

**Table S1.** Projective cover of dwarf shrub, grass, moss layers and lichens at the studied bog (%).

| Description №          | Dwarf shrub layer          |                    |                         |                                |                                |                       |                            |                             | Grass layer                  |                     |                             |                          |                          |                               | Moss layer                     |                      |                             |                         | Lichens              |                     |
|------------------------|----------------------------|--------------------|-------------------------|--------------------------------|--------------------------------|-----------------------|----------------------------|-----------------------------|------------------------------|---------------------|-----------------------------|--------------------------|--------------------------|-------------------------------|--------------------------------|----------------------|-----------------------------|-------------------------|----------------------|---------------------|
|                        | <i>Andromeda polifolia</i> | <i>Betula nana</i> | <i>Calluna vulgaris</i> | <i>Chamaedaphne calyculata</i> | <i>Empetrum hermaphroditum</i> | <i>ledum palustre</i> | <i>Vaccinium myrtillus</i> | <i>Vaccinium uliginosum</i> | <i>Vaccinium vitis-idaea</i> | <i>Carex limosa</i> | <i>Eriophorum vaginatum</i> | <i>Rhynchospora alba</i> | <i>Rubus chamaemorus</i> | <i>Scheuchzeria palustris</i> | <i>Trichophorum cespitosum</i> | <i>Dicranum spp.</i> | <i>Pleurozium schreberi</i> | <i>Politrichum spp.</i> | <i>Sphagnum spp.</i> | <i>Cladina spp.</i> |
| Lawn                   |                            |                    |                         |                                |                                |                       |                            |                             |                              |                     |                             |                          |                          |                               |                                |                      |                             |                         |                      |                     |
| 1                      | 40                         | +                  | +                       | 15                             | 10                             | 10                    | 15                         | 15                          |                              | +                   | +                           | 15                       |                          |                               |                                | 80                   | 50                          | +                       | 30                   |                     |
| 2                      | 5                          | 5                  |                         |                                |                                |                       |                            |                             |                              | +                   |                             |                          | +                        |                               |                                | 100                  |                             |                         | 100                  |                     |
| 3                      | 5                          | 5                  |                         |                                |                                |                       |                            |                             |                              | +                   |                             |                          |                          | +                             |                                | 100                  |                             |                         | 100                  |                     |
| 4                      | 25                         | 15                 |                         | +                              | 5                              | +                     | 5                          | 15                          |                              | +                   |                             |                          | 15                       |                               |                                | 10                   | 5                           | +                       | 5                    | 20                  |
| 5                      | 10                         | +                  |                         | +                              | 5                              | +                     | 5                          | 10                          |                              | +                   |                             |                          | 10                       |                               |                                | 100                  |                             |                         | 100                  |                     |
| Hummock-hollow complex |                            |                    |                         |                                |                                |                       |                            |                             |                              |                     |                             |                          |                          |                               |                                |                      |                             |                         |                      |                     |
| 1                      | 80                         | +                  | 5                       | +                              | +                              | 70                    | 5                          | 20                          |                              | +                   |                             |                          | 20                       |                               |                                | 20                   |                             |                         | 20                   |                     |
| 2                      | 45                         | 20                 | +                       | 10                             | +                              | 5                     | 10                         | 15                          |                              | +                   |                             |                          | 15                       |                               |                                | 60                   |                             |                         | 60                   |                     |
| 3                      | 10                         | 10                 |                         |                                |                                |                       |                            |                             |                              | +                   |                             |                          |                          | +                             |                                | 100                  |                             |                         | 100                  |                     |
| 4                      |                            |                    |                         |                                |                                |                       |                            |                             |                              |                     |                             |                          |                          | +                             |                                | 100                  |                             |                         | 100                  |                     |
| 5                      |                            |                    |                         |                                |                                |                       |                            | 15                          |                              |                     |                             | 15                       |                          | +                             |                                | 40                   |                             |                         | 40                   |                     |
| 6                      | 15                         | +                  |                         | 15                             |                                | +                     |                            | 5                           |                              |                     |                             |                          | 5                        |                               |                                | 60                   |                             |                         | 60                   | 30                  |
| 7                      |                            | +                  |                         |                                |                                |                       |                            |                             |                              |                     |                             |                          |                          |                               |                                | 100                  |                             |                         | 100                  |                     |
| 8                      | 10                         | 10                 |                         |                                |                                |                       |                            | 15                          |                              |                     |                             | 15                       |                          |                               |                                | 20                   |                             |                         | 20                   |                     |
| 9                      |                            |                    |                         |                                |                                |                       |                            | 5                           |                              |                     |                             |                          |                          | 5                             |                                | 90                   |                             |                         | 90                   |                     |

| Description №               | <i>Dwarf shrub layer</i> | <i>Andromeda polifolia</i> | <i>Betula nana</i> | <i>Calluna vulgaris</i> | <i>Chamaedaphne calyculata</i> | <i>Empetrum hermaphroditum</i> | <i>ledum palustre</i> | <i>Vaccinium mirillus</i> | <i>Vaccinium uliginosum</i> | <i>Vaccinium vitis-idea</i> | <i>Grass layer</i> | <i>Carex limosa</i> | <i>Eriophorum vaginatum</i> | <i>Rhynchospora alba</i> | <i>Rubus chamaemorus</i> | <i>Scheuchzeria palustris</i> | <i>Trichophorum cespitosum</i> | <i>Moss layer</i> | <i>Dicranum spp.</i> | <i>Pleurozium schreberi</i> | <i>Politrichum spp</i> | <i>Sphagnum spp.</i> | <i>Lichens</i> | <i>Cladina spp.</i> |   |
|-----------------------------|--------------------------|----------------------------|--------------------|-------------------------|--------------------------------|--------------------------------|-----------------------|---------------------------|-----------------------------|-----------------------------|--------------------|---------------------|-----------------------------|--------------------------|--------------------------|-------------------------------|--------------------------------|-------------------|----------------------|-----------------------------|------------------------|----------------------|----------------|---------------------|---|
| Hummock-hollow-pool complex |                          |                            |                    |                         |                                |                                |                       |                           |                             |                             |                    |                     |                             |                          |                          |                               |                                |                   |                      |                             |                        |                      |                |                     |   |
| 1                           | 45                       | 5                          |                    | 10                      |                                | 15                             | 10                    |                           | 5                           | +                           | 10                 |                     | +                           |                          | 10                       |                               |                                | 40                |                      | 10                          |                        | 30                   |                |                     | + |
| 2                           |                          | +                          |                    |                         |                                |                                |                       |                           |                             |                             |                    |                     |                             | +                        |                          |                               |                                | 95                |                      |                             |                        | 95                   |                |                     |   |
| 3                           |                          | +                          |                    |                         |                                | +                              |                       |                           |                             |                             |                    |                     | +                           |                          | +                        |                               | +                              | 95                |                      |                             |                        | 95                   |                |                     |   |
| 4                           |                          | +                          |                    |                         |                                |                                |                       |                           |                             |                             |                    | +                   | +                           | +                        | +                        |                               |                                | 95                |                      |                             |                        | 95                   |                |                     |   |
| 5                           | 15                       | 15                         |                    | +                       |                                | +                              | +                     |                           | +                           |                             | 10                 |                     |                             |                          | 10                       |                               | +                              | 80                |                      |                             |                        | 80                   |                |                     |   |
| Hummock-pool complex        |                          |                            |                    |                         |                                |                                |                       |                           |                             |                             |                    |                     |                             |                          |                          |                               |                                |                   |                      |                             |                        |                      |                |                     |   |
| 1                           | 50                       | +                          |                    | 5                       | +                              | 5                              | 15                    | +                         | 20                          | 5                           | 30                 |                     | +                           |                          | 30                       |                               |                                | 55                | 5                    | 30                          | 5                      | 20                   |                |                     | + |
| 2                           | 30                       | 20                         |                    | 5                       | 5                              | +                              |                       |                           |                             |                             | 20                 |                     | +                           |                          | 20                       |                               |                                | 60                |                      |                             |                        | 60                   |                |                     |   |
| 3                           |                          | +                          |                    |                         |                                |                                |                       |                           |                             |                             | 5                  |                     | +                           | 5                        |                          | +                             |                                | 95                |                      |                             |                        | 95                   |                |                     |   |
| 4                           | 15                       | 5                          |                    | 10                      |                                | +                              |                       |                           |                             |                             | 5                  |                     | +                           |                          | 5                        | +                             |                                | 70                |                      |                             |                        | 70                   |                |                     |   |
| 5                           |                          | +                          |                    |                         |                                |                                |                       |                           |                             |                             | 25                 |                     | 20                          | 5                        |                          | +                             |                                | 50                |                      |                             |                        | 50                   |                |                     |   |

\* The table doesn't contain *Drosera spp.*, *Oxycoccus spp.* and some species of mosses and lichens, because it have a low percentage of projective cover and are weakly involved in the formation of vegetation cover.
